# Supplementary material for: Changes in transcription of cytokinin metabolism and signalling genes in grape (Vitis vinifera L.) berries are associated with the ripening-related increase in isopentenyladenine
Source: PubMed Central journal article supplement (PMC4573921; doi:10.1186/s12870-015-0611-5), 2015-09-16
Supplement: 12870_2015_611_MOESM1_ESM.pdf [file 12870_2015_611_MOESM1_ESM.pdf]

| Gene name | TAIR Accession      |
|-----------|---------------------|
| AtIPT1    | Sequence:2201294    |
| AtIPT2    | Sequence:3694256    |
| AtIPT3    | Sequence:3702189    |
| AtIPT4    | Sequence:2121981    |
| AtIPT5    | Sequence:2179631    |
| AtIPT6    | Sequence:2031207    |
| AtIPT7    | Sequence:2088027    |
| AtIPT8    | Sequence:2094130    |
| AtIPT9    | Sequence:6530300609 |
| AtLOG1    | Sequence:1005033809 |
| AtLOG2    | Sequence:1009036063 |
| AtLOG3    | Sequence:6530299313 |
| AtLOG4    | Sequence:2084053    |
| AtLOG5    | Sequence:3705872    |
| AtLOG6    | Sequence:2143475    |
| AtLOG7    | Sequence:1009065332 |
| AtLOG8    | Sequence:2143031    |
| AtLOG9    | Sequence:2180674    |
| AtCKX1    | Sequence:4515104683 |
| AtCKX2    | Sequence:3695356    |
| AtCKX3    | Sequence:2164617    |
| AtCKX4    | Sequence:1005717052 |
| AtCKX5    | Sequence:2018439    |
| AtCKX6    | Sequence:4010715489 |
| AtCKX7    | Sequence:1005717605 |
| AtCKI1    | Sequence:2061973    |
| AtCRE1    | Sequence:1005719081 |
| AtHK1     | Sequence:3696042    |
| AtHK2     | Sequence:3710958    |
| AtHK3     | Sequence:3687867    |
| AtHK5     | Sequence:4010715876 |
| AtRR1     | Sequence:1009045452 |
| AtRR2     | Sequence:5019475873 |
| AtRR3     | Sequence:2025913    |
| AtRR4     | Sequence:2194586    |
| AtRR5     | Sequence:2097872    |
| AtRR6     | Sequence:2170725    |
| AtRR7     | Sequence:2011288    |
| AtRR8     | Sequence:2040284    |
| AtRR9     | Sequence:2080592    |
| AtRR10    | Sequence:1005031868 |
| AtRR11    | Sequence:2008587    |
| AtRR12    | Sequence:5019475371 |
| AtRR13    | Sequence:2059270    |
| AtRR14    | Sequence:2065400    |
| AtRR15    | Sequence:1005036131 |
| AtRR16    | Sequence:6530299348 |
| AtRR17    | Sequence:3702839    |
| AtRR18    | Sequence:4010716191 |
| AtRR19    | Sequence:6530298673 |
| AtRR20    | Sequence:6530299927 |
| AtRR21    | Sequence:2182892    |
| AtRR23    | Sequence:2174065    |
