# Supplementary material for: Changes in transcription of cytokinin metabolism and signalling genes in grape (Vitis vinifera L.) berries are associated with the ripening-related increase in isopentenyladenine
Source: PubMed Central journal article supplement (PMC4573921; doi:10.1186/s12870-015-0611-5), 2015-09-16
Supplement: 12870_2015_611_MOESM2_ESM.pdf [file 12870_2015_611_MOESM2_ESM.pdf]

| Gene       | NCBI Reference Sequence | Primer sequence (5'-3')                                                                                               | Amplicon size (bp) |
|------------|-------------------------|-----------------------------------------------------------------------------------------------------------------------|--------------------|
| VviIPT2    | XM_002263711            | F: CCCTCACATTCCCTTTCAGC<br>R: GGTCTACGGCAGGCTATTGG                                                                    | 108                |
| VviIPT9    | XM_002282976            | F: TTGTGCCAGTTCTGCAAGGT<br>R: AGGCATTCATCAACCGTGA                                                                     | 127                |
| VviIPT10   | XM_002279335            | F: GCGAGTCGATGAAATGCTTG<br>R: ACTTTCGGAAATGCCTGTCTG                                                                   | 140                |
| VviIPT11   | XM_002268812            | F: TGGACGCCACTGAAGTGTTT<br>R: GCGTTCCTCACCATCTCTT                                                                     | 152                |
| VviIPT12   | XM_002271926            | F: ATGCATATGCGCAAGCAAAC<br>R: CCCATTACCACCACCACCTT                                                                    | 110                |
| VviIPT13   | XM_003632592            | F: AGGGGTGGGCTAGTGGAAGA<br>R: GCCCTCAAGTAGGCGTCCAT                                                                    | 110                |
| VviIPT14   | XM_002277555            | F: AAGCACAGACGCCCTACTG<br>R: CCGGTGGCTCCTATCACGAA                                                                     | 100                |
| VviIPT15   | XM_002278900            | F: CACATATGCTCGATCCCACCG<br>R: ACCAAAACCTGACCATGGTTGC                                                                 | 95                 |
| VviCYP735A | XM_002280169            | F: GGCAGCTCTCGTCTCCAAAT<br>R: GGCAGCTCTCGTCTCCAAAT                                                                    | 112                |
| VviLOG5a   | XM_010665788            | F: CAAGCTGGGCCCATGTGATG<br>R: GGAGAGGTTTCGACCCGTAGC                                                                   | 136                |
| VviLOG5b   | XM_002281803            | F: TCAAGCCTTCACAGCGCCAT<br>R: CCTCGCCTTTGCAATGACCC                                                                    | 110                |
| VviLOG10   | XM_002276739            | F: CACATGGGCTCAGCTGGGTA<br>R: TGACGGCAGCTGCTGTTAT                                                                     | 134                |
| VviLOG11   | XM_002275378            | F: GTCCGCACCAACAGCCAAAG<br>R: GCCACACCAGGCTTCTCTGA                                                                    | 129                |
| VviLOG12   | XM_002276243            | F: TCATTAGTCCCAGTGCCCGC<br>R: GCTGCTCCATCTCCCAGCTC                                                                    | 129                |
| VviLOG13   | XM_002285210            | F: GGCAGTGGGGGCTGATACAA<br>R: TCCATGACAAACCGGTGGGA                                                                    | 132                |
| VviLOG14   | XM_002285680            | F: TATCAGGGCATGCGGTTGGG<br>R: TCCATACCCACCAGGAAGTGC                                                                   | 110                |
| VviLOG15   | XM_002274711            | F: TTTCAGCAACCACGGCAGAAG<br>R: TGGTCCACTTCCCAGGTTTG                                                                   | 97                 |
| VviLOG16   | XM_002277816            | F: CAGTGGGGCTATTGAATGTGGAC<br>R: AGTTCTTCTGCCGTGTCTGCTG                                                               | 130                |
| VviLOG17   | XM_002278269            | F: AGCATGTGGGCTTCATGTCTT<br>R: CCAGTTGCGTGAAAGAGCGT                                                                   | 111                |
| VviCKX5    | XM_002280761            | F: TCTCAGCAATCAGAACCGTCAGA<br>R: GGGGTCTGAAGTCCATCTTTC                                                                | 160                |
| VviCKX6a   | XM_002270805            | F: TTGTGGGAGGTTCCACACCC<br>R: GAATGGGGCCATTGCTGGTG                                                                    | 115                |
| VviCKX6b   | XM_002284524            | F: TGCAGAAATCCTGCTCCATGA<br>R: AAGTGGCAAGCGCACTTTGG                                                                   | 138                |
| VviCKX7    | XM_002279924            | F: TCCTCAAGCTAGGGTTGCCG<br>R: GGAAGGTTGGAAGCGCACT                                                                     | 132                |
| VviCKX8    | XM_002279483            | F: CATGGGCTGATGTCCTCCCC<br>R: GCAGCTGGGGTTTGTGGAC                                                                     | 127                |
| VviCKX9    | XM_003632356            | F: TCCTGCACAATTGTCCTCTAACA<br>R: TCTGAGACTTCATCAACTGTATGGC                                                            | 160                |
| VviCKX10   | XM_002263610            | F1: TTGCACCAGTGTCTGGACT<br>R1: TGATCTGAGGACCATGGCGG<br>F2: ACTTCTCCACATTTTCTAGAGACCA<br>R2: ATTAGGAGGACTATTTTGCATGGAG | no product         |
| VviCKX11   | XM_002264409            | F: TCGCTCTAAAACCGGCACCA<br>R: TGCATCAAGAGTGAACCTTCCA                                                                  | 136                |
| VviCHK2    | XM_002269941            | F: ATTGTCACCTGCGTGGACAG<br>R: CCCATCCATCTCTGGCATTT                                                                    | 105                |
| VviCHK3    | XM_002276925            | F: GGAGCTGATGTCGTCTGTGC<br>R: GCTTCAAACCCGTCCATTTT                                                                    | 119                |
| VviCHK4    | XM_002285081            | F: AGCCATCCATCCCACATTTT<br>R: ACGGCTGCTCGAGAGTAAGG                                                                    | 158                |

| Gene     | NCBI Reference Sequence | Primer sequence (5'-3')                                                                                                | Amplicon size (bp) |
|----------|-------------------------|------------------------------------------------------------------------------------------------------------------------|--------------------|
| VviRR11a | XM_002274637            | F: TTGAGAGCGCATAGGCGTGA<br>R: TGCAGTCTGCTCCACAGCAT                                                                     | 128                |
| VviRR11b | XM_002267580            | F: TGCCAAATGGTAAACCCTCAAGC<br>R: AGAGCTGACCCACTCCCTGA                                                                  | 140                |
| VviRR25  | XM_002269335            | F: TTGGCCAGGGAATGGTCTCC<br>R: GCCCGGCCTAGGCATACTTT                                                                     | 131                |
| VviRR26  | XM_002270082            | F: AGGATGCATTTGCCTGGGCT<br>R: ACCTTTGGCCCACTGAACTGT                                                                    | 95                 |
| VviRR27  | XM_002275106            | F: AGCTGCATGATATGCGAACGTG<br>R: TGCCCCATAACCAACACAACCT                                                                 | 129                |
| VviRR28  | XM_002281255            | F: ACCCAAGCACTGTCCAGAGA<br>R: GGCGCAAATTCTCAGTGCCT                                                                     | 120                |
| VviRR29  | XM_002270797            | F: TGGCGTCAGTGGTTCATCT<br>R: ACGGATCGCGATTGAGTGGT                                                                      | 114                |
| VviRR30  | XM_002282892            | F: GCGTCTTGCTCTGTTCCCTG<br>R: GTTGAAGCAAGTTGCCCT                                                                       | 137                |
| VviRR31  | FJ822980 (partial cds)  | F: CCGGGAAACTCCGGTGGTAA<br>R: CTTTCAGCCGCTTCACGTCC                                                                     | 128                |
| VviRR32  | XM_002283751            | F: CATAACCCTGTCATCCCAGGCA<br>R: ACGGCTGTGGAGAGTGGAAC                                                                   | 133                |
| VviRR33  | XM_002280710            | F: TCCTGCCCTAGGGATGGAT<br>R: AAGTGCCTGGAGGAAGGAGC                                                                      | 149                |
| VviRR34  | XM_002284468            | F: CCCGGGATGAGCGGTTATGA<br>R: TGCCCCTCCTTCCAAACACA                                                                     | 126                |
| VviRR35  | XM_002273954            | F: GCTAGCTGTTGATGACAGCCTT<br>R: ACGGAAGGTGTGTTTGGGTCA                                                                  | 147                |
| VviRR36  | XM_002266214            | F1: CCAGTTGTGATCATGTCCTCTGA<br>R1: GCGAGACCTCAACATCTACGAGT<br>F2: AATCATCACCAAGGAACGAAAGT<br>R2: TGATCACAACCTGGGATGCCT | no product         |
| VviRR37  | XM_002268316            | F: AGCTTCAAAGGCTGTTTCATGTCT<br>R: TCGATTGAAGACATTTTTGGAGGGT                                                            | 116                |
| VviRR38  | XM_002267339            | F: AGCTGTTGATGACAGCCTCGT<br>R: TGCCTCTTGCAAACCCAGGA                                                                    | 124                |
| VviRR39  | XM_002267896            | F: TGGGTATTGCTGCAGAGACACAG<br>R: CCTACTCCCAGAATCCACAGCA                                                                | 129                |
| VviRR40  | XM_003634849            | F: TCTAGCTGTTGATGACAGCCTCATT<br>R: CTTTCCTGTTCTGCCTCTTGAC                                                              | 138                |
| VviRR41  | XM_002267368            | F: TGTTTGGGAAGAAGGAGCAGAA<br>R: CTTTTCCCTTCAGTAGATGGGG                                                                 | 91                 |
