# Supplementary material for: Changes in transcription of cytokinin metabolism and signalling genes in grape (Vitis vinifera L.) berries are associated with the ripening-related increase in isopentenyladenine
Source: PubMed Central journal article supplement (PMC4573921; doi:10.1186/s12870-015-0611-5), 2015-09-16

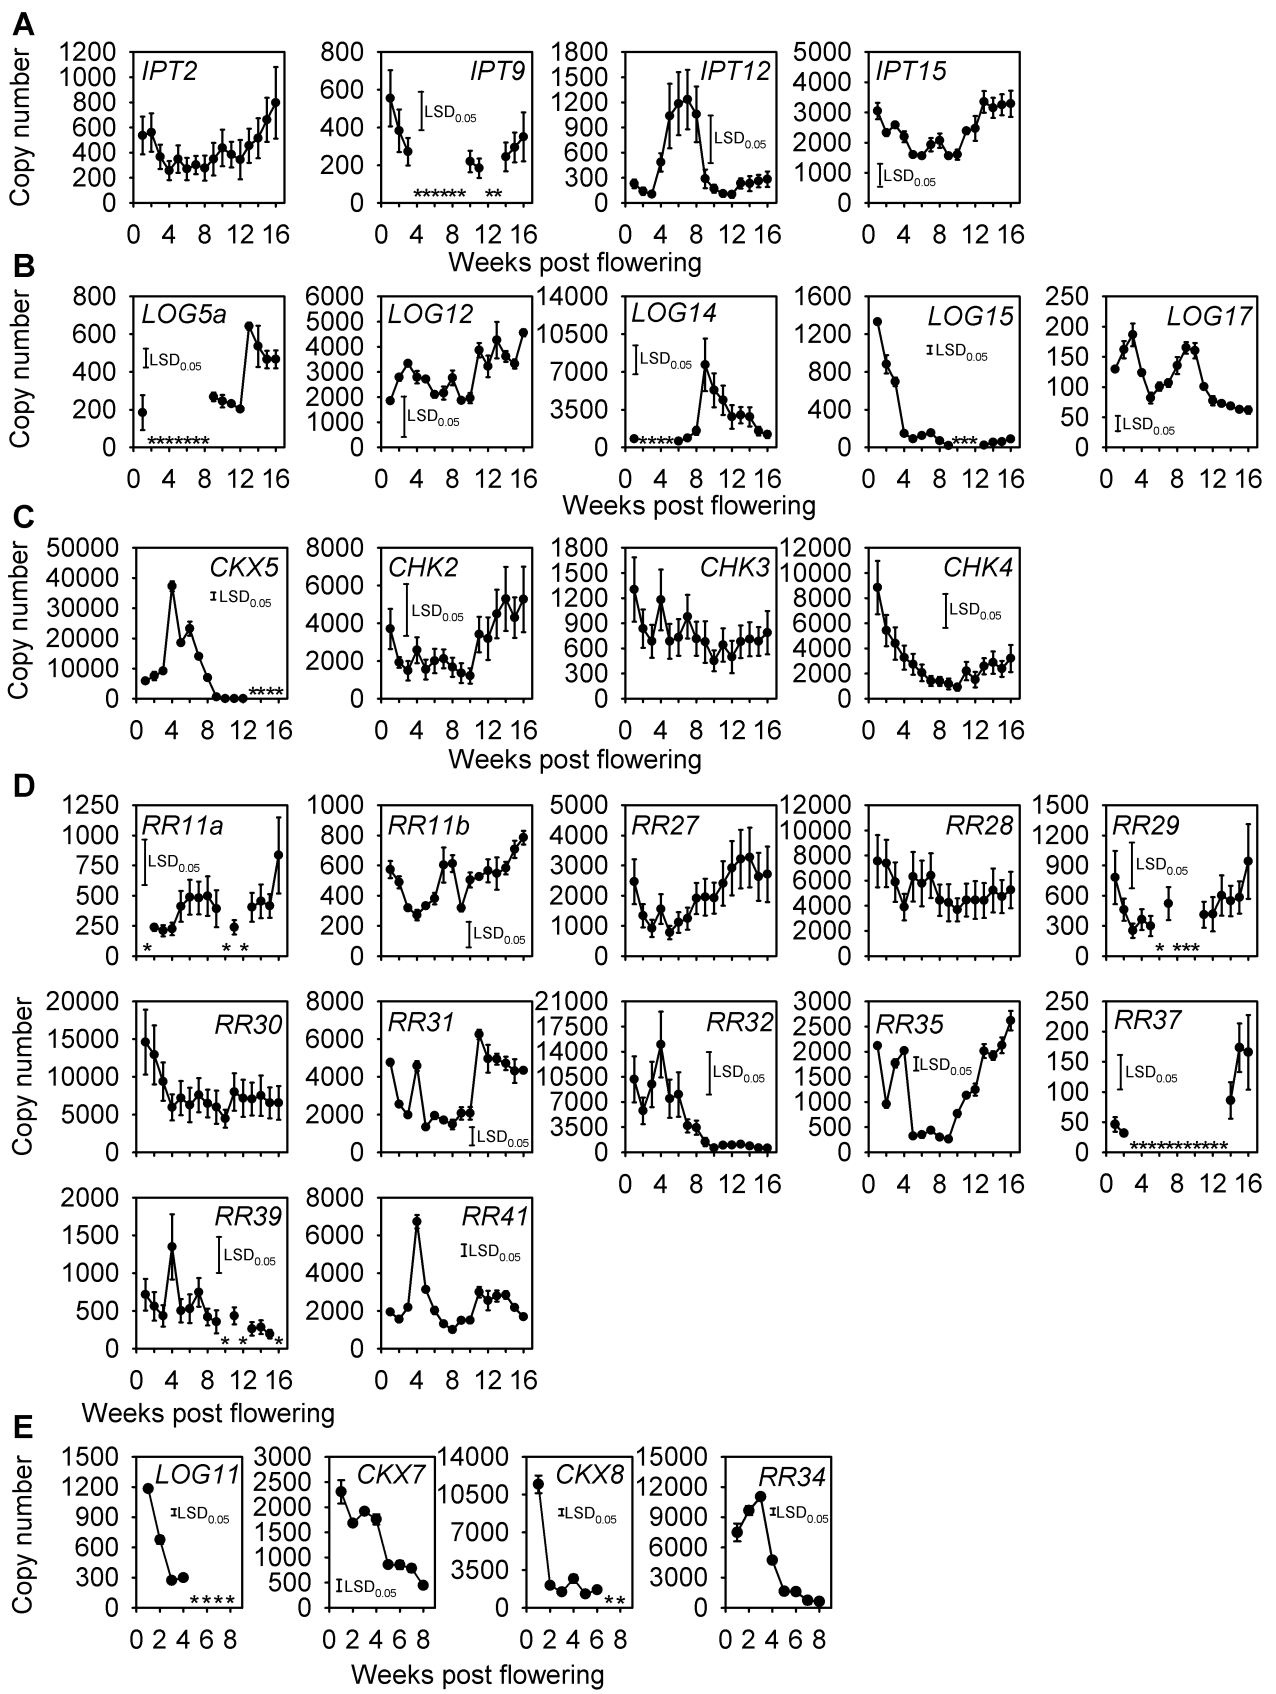

Supplement: 12870_2015_611_MOESM5_ESM.pdf [file 12870_2015_611_MOESM5_ESM.pdf]
